1           **Title: Gonadectomy and blood sampling procedures in small size teleost models**

2

3           **AUTHORS AND AFFILIATIONS:**

4           Muhammad Rahmad Royan<sup>1</sup>, Shinji Kanda<sup>2</sup>, Daichi Kayo<sup>3</sup>, Weiyi Song<sup>4</sup>, Wei Ge<sup>4</sup>, Finn-  
5           Arne Weltzien<sup>1</sup>, Romain Fontaine<sup>1</sup>

6

7           <sup>1</sup>Physiology Unit, Faculty of Veterinary Medicine, Norwegian University of Life Sciences,  
8           Oslo, Norway

9           <sup>2</sup>Laboratory of Physiology, Atmosphere and Ocean Research Institute, The University of  
10          Tokyo, 5-1-5 Kashiwanoha, Kashiwa, Chiba 277-8564, Japan

11          <sup>3</sup>Department of Biological Sciences, Graduate School of Science, The University of Tokyo,  
12          7-3-1 Hongo, Bunkyo, Tokyo 133-0033, Japan

13          <sup>4</sup>Centre of Reproduction, Development and Aging (CRDA), Faculty of Health Sciences,  
14          University of Macau, Taipa, Macau, 999078, China

15

16          **Corresponding Author:**

17          Romain Fontaine ([romain.fontaine@nmbu.no](mailto:romain.fontaine@nmbu.no))

18

19          **Email Addresses of Co-Authors:**

20          Muhammad Rahmad Royan ([muhammad.rahmad.royan@nmbu.no](mailto:muhammad.rahmad.royan@nmbu.no))

21          Shinji Kanda ([shinji@aori.u-tokyo.ac.jp](mailto:shinji@aori.u-tokyo.ac.jp))

22          Daichi Kayo ([kayo@marine.fs.a.u-tokyo.ac.jp](mailto:kayo@marine.fs.a.u-tokyo.ac.jp))

23          Weiyi Song ([songweiyi798@gmail.com](mailto:songweiyi798@gmail.com))

24          Wei Ge ([weige@um.edu.mo](mailto:weige@um.edu.mo))

25          Finn-Arne Weltzien ([finn-arne.weltzien@nmbu.no](mailto:finn-arne.weltzien@nmbu.no))

26          Romain Fontaine ([romain.fontaine@nmbu.no](mailto:romain.fontaine@nmbu.no))

27

28

29          **Key words:** Gonadectomy, ovariectomy, orchidectomy, castration, medaka, zebrafish,  
30          blood, steroids, fish, reproduction, plasticity, estradiol, 11-ketotestosterone

31

32          **SUMMARY:**

33 The article describes a quick protocol to gonadectomize and sample blood from small  
34 teleost fish, using medaka (*Oryzias latipes*) as a model, to investigate the role of sex  
35 steroids in animal physiology.

36

37 **Abstract:**

38 Sex steroids, produced by the gonads, play an essential role in the neuroendocrine  
39 control of reproduction in all vertebrates by providing feedback to the brain and pituitary.  
40 Sex steroids also play an important role in tissue plasticity by regulating cell proliferation  
41 in several tissues including the brain and the pituitary. Therefore, investigating the role of  
42 sex steroids and mechanisms by which they act is crucial to better understand both  
43 feedback mechanism and tissue plasticity. Teleost fish, which possess a higher degree of  
44 tissue plasticity and variations in reproduction strategies compared to mammals, appear  
45 to be useful models to investigate these questions. The removal of the main source of sex  
46 steroid production using gonadectomy together with blood sampling to measure steroid  
47 levels, have been well-established and fairly feasible in bigger fish and are powerful  
48 techniques to investigate the role and effects of sex steroids. However, small fish such as  
49 zebrafish and medaka, which are particularly good model organisms considering the well-  
50 developed genetic toolkit and the numerous protocols available to investigate their  
51 biology and physiology, raise challenges for applying such protocols due to their small  
52 size. Here, we demonstrate the step-by-step procedure of gonadectomy in both males  
53 and females followed by blood sampling in a small sized teleost model, the Japanese  
54 medaka (*Oryzias latipes*). The use of these procedures combined with the other  
55 advantages of using these small teleost models will greatly improve our understanding of  
56 feedback mechanisms in the neuroendocrine control of reproduction and tissue plasticity  
57 provided by sex steroids in vertebrates.

58

59

60

61 **Introduction**

62 In vertebrates, sex steroids, which are mainly produced by the gonads, play  
63 important roles in the regulation of the Brain-Pituitary-Gonadal (BPG) axis through

64 various feedback mechanisms (reviewed in <sup>1-5</sup>). In addition, sex steroids also affect the  
65 proliferation and activity of neurons in the brain (reviewed in <sup>6-8</sup>) and endocrine cells,  
66 including gonadotropes, in the pituitary (reviewed in <sup>9,10</sup>), and thus serve crucial roles in  
67 brain and pituitary plasticity.

68 Despite a relatively good knowledge in mammals, mechanism of BPG axis  
69 regulation mediated by sex steroids is far from being understood in non-mammalian  
70 species, leading to poor understanding of evolutionary conserved principles (reviewed in  
71 <sup>11</sup>). Besides, there is still a limited number of studies documenting the role of sex steroids  
72 on brain and pituitary plasticity, thus raising the need for further investigations of the  
73 role and effects of sex steroids on diverse vertebrate species.

74 Among vertebrates, teleosts have become powerful model animals in addressing  
75 numerous biological and physiological questions, including stress response (reviewed in  
76 <sup>12,13</sup>), growth (reviewed in <sup>14,15</sup>), nutritional physiology (reviewed in <sup>16,17</sup>) and reproduction  
77 (reviewed in <sup>2</sup>). Teleosts, in which sex steroids are mostly represented by estradiol (E2) in  
78 females and 11-ketotestosterone (11-KT) in males <sup>18,19</sup>, have thus long been reliable  
79 experimental models for investigating the general principle of reproduction across  
80 species. Also, teleosts possess unique characteristics in their hypothalamus and pituitary,  
81 which are sometimes convenient for the elucidation of regulatory mechanisms. For  
82 instance, they show direct pituitary innervation of hypophysiotropic neurons in the brain  
83 instead of mediating the hypothalamic-hypophyseal portal system (reviewed in <sup>20,21</sup>) and  
84 their gonadotropins (luteinizing and follicle stimulating hormones) are produced in two  
85 separate cells in these animals (reviewed in <sup>22</sup>). Due to the high number of species (nearly  
86 30 000 <sup>23</sup>) and their high diversity <sup>24</sup>, these animals offer interesting models to investigate  
87 a wide range of biological questions (reviewed in <sup>25</sup>). Moreover, due to their amenability  
88 to both laboratory and field experiments, teleosts offer many advantages compared to  
89 other organisms. They are relatively inexpensive to purchase and maintain (reviewed in  
90 <sup>25,26</sup>). In particular, small teleost models, such as zebrafish and medaka, are species with  
91 very high fecundity and relatively short life cycle enabling rapid analysis of gene function  
92 and disease mechanisms, thus providing even greater advantages in addressing a  
93 plethora of biological and physiological questions, considering the numerous well-  
94 developed protocols and genetic tools available for these species (reviewed in <sup>27,28</sup>).

95 In numerous studies, the removal of gonads (gonadectomy), the main source of  
96 sex steroid production, has been used as a method for investigating many physiological  
97 questions, including its impact in vertebrate reproductive physiology, including in  
98 mammals<sup>29-31</sup>, birds<sup>32</sup> and amphibians<sup>33</sup>. Meanwhile, blood collection is commonly  
99 aimed for quantifying circulating hormone levels, including those of sex steroids<sup>34-37</sup>.  
100 Together, these two techniques have shown their importance in a great number of  
101 studies, including the investigation of feedback mechanisms and the effect of sex steroids  
102 on BPG axis regulation<sup>38-40</sup>. In teleosts however, while these techniques are relatively  
103 easy to perform in bigger species, such as European sea bass<sup>41</sup>, coral reef fish<sup>42</sup>, dogfish  
104<sup>43</sup> and catfish<sup>44,45</sup>, they raise challenges when applied in smaller fishes, such as zebrafish  
105 and medaka. Therefore, a clear protocol demonstrating every step of gonadectomy and  
106 blood sampling in small teleosts is of importance.

107 Here, we use Japanese medaka (*Oryzias latipes*) as a model, a small freshwater  
108 fish native to East Asia, and similar to zebrafish in many aspects (size, genome sequenced,  
109 molecular and genetic tools available). However, medaka has a smaller genome size than  
110 that of zebrafish<sup>46</sup> and a genetic sex determination system allowing for investigation of  
111 sexual differences before second sexual characters or gonads are well developed  
112 (reviewed in<sup>47</sup>).

113 This paper demonstrates gonadectomy and blood sampling in small teleost  
114 models, a technique that takes only 8 minutes in total and that will complete the list of  
115 detailed video protocols already existing for this species that included labeling of blood  
116 vessels<sup>48</sup>, patch-clamp on pituitary sections<sup>49</sup> and brain neurons<sup>50</sup>, and primary cell  
117 culture<sup>51</sup>. This technique will allow the research community to investigate and better  
118 understand the roles of sex steroids in feedback mechanisms as well as brain and  
119 pituitary plasticity in the future.

120

## 121 Protocol

122 All experimentations and animal handling were conducted in accordance with the  
123 recommendations on the experimental animal welfare at Norwegian University of Life

124 Sciences. Experiments using gonadectomy were approved by the Norwegian Food Safety  
125 Authority (FOTS ID 24305).

## 126 1. Instruments and solutions preparation

127 1.1. Prepare anesthesia stock solution (0.6% Tricaine):

128 1.1.1. Dilute 0.6 g of Tricaine in 100 ml of 10X Phosphate Buffer Saline (PBS).

129 1.1.2. Distribute 800  $\mu$ l of the tricaine stock solution into several 1.5 ml plastic tubes  
130 and store at -20 °C until use.

131

132 1.2. Prepare recovery water (0.9% NaCl solution) by adding 18 g of NaCl into 2 L of  
133 aquarium water. Store the solution at room temperature until use.

134

135 1.3. Prepare the incision tools by breaking a razor diagonally to get a sharp point  
136 (**Figure 1A**).

137

138 1.4. Prepare blood anti-coagulant solution (0.05 U/ $\mu$ l of sodium heparin) by diluting 25  
139  $\mu$ l of sodium heparin into 500  $\mu$ l of 1X PBS. Store the anti-coagulant solution at 4 °C  
140 until use.

141

142 1.5. Prepare two glass needles from a 90 mm long glass capillary by pulling a glass  
143 capillary with a needle puller (**Figure 1B**) following the instructions of the  
144 manufacturer.

145

146 **NOTE:** The outer diameter of the glass needle is 1 mm, while the inner diameter is 0.6  
147 mm.

148

149 1.6. Prepare a 1.5 ml plastic tube lid by cutting the lid and make a hole that fits with  
150 the needle outer diameter (**Figure 1C**). To make the hole, heat one end of the 9-mm  
151 glass capillary and stab the heated glass capillary through the lid. Alternatively, use a  
152 needle to stab through the lid until the diameter of the hole fits with the 9-mm glass  
153 capillary.

154

155    2. Gonadectomy procedure

156    2.1. Prepare 0.02% of anesthesia solution (MS-222) by diluting one tube of Tricaine  
157       stock (0.6%) in 30 ml of recovery water.

158    **NOTE:** Depending on the size of the fish, additional Tricaine stock can be added, but final  
159       concentration of 0.02 % usually works well.

160    In our experience, most cases that fish did not recover after surgery were due to over  
161       exposure to high concentration of anesthesia, probably not due to the mistake in surgery.

162

163    2.2. Prepare dissection tools including one ultra-fine and two fine forceps (one with  
164       relatively wide tip), small scissors, nylon thread and razor as described in **step 1.3**.

165

166    2.3. Anesthetize the fish by putting it into the 0.02% anesthesia solution, and make  
167       sure that the fish is anesthetized enough to be operated.

168    **NOTE:** To ensure that the fish is fully anesthetized, the fish body can be pinched gently  
169       using forceps. If the fish does not react, the gonadectomy can be started.

170

171    2.4. Place the anesthetized fish under a dissection microscope.

172

173    2.5. Ovariectomy in females

174       2.5.1. Remove oviposited eggs (eggs hanging outside the female body) if any, and  
175           scrap the scales in the incision area (**Figure 2A**).

176

177       2.5.2. Incise gently the incision area between the ribs (**Figure 2A**) using the razor  
178           blade, pinch gently the fish abdomen while taking out the ovary little by little  
179           using fine forceps with wide tip.

180

181       2.5.3. Cut the end of the ovary using fine forceps and put aside the ovary (**Figure 2B**).

182 **NOTE:** It is important to take care not to break the ovarian sac as possible. In case of  
183 breaking the ovarian sac, it is important to remove as completely as possible without  
184 leaving even some non-ovulated eggs.

185

## 186 2.6. Orchidectomy in males

187 2.6.1. After making an incision with the razor blade, incise gently between the ribs  
188 (Figure 2A) and open up the incision slowly using fine forceps.

189

190 2.6.2. Grab the testis gently using the fine forceps and take out the testes slowly.  
191 Afterwards, cut the end of the testis to remove testis completely (Figure 2B).

192

193 **NOTE:** For male orchidectomy, all preparations are similar to in females until the incision  
194 part. Incision area of males should be more dorsal side of the abdomen (Figure 2A).  
195 When grabbing the testes, sometimes we obtain only the fat resembling the testes.  
196 However, after restoring the fat, it is possible to try to find the testes again. (Figure 2B).

197

198 **NOTE:** For both males and females, it is important to minimize the incision size in the  
199 abdomen to prevent excessive damage that can lead to mortality. Sometimes the  
200 intestines may also appear through the incision along with the gonads, so make sure they  
201 are properly returned inside the incision before closure. It is important to understand  
202 where ovaries or testes are localized in medaka abdomen by dissection.

203

## 204 2.7. Suture the incision similarly in males and females (Figure 3).

205 2.7.1. Place the nylon thread beside the incision area, inject the right side of incision  
206 part from inner body cavity using ultra-fine forceps to take the thread in with  
207 the help of fine forceps (Figure 3;1-2).

208

209 2.7.2. Inject the left side of incision part from outer body cavity to take out the  
210 thread (**Figure 3;3-4**).

211

212 2.7.3. Close the incision opening and make two knots and cut the excessive thread  
213 (**Figure 3;4-6**).

214 2.7.4. Put the fish directly into the recovery water.

215 **NOTE:** The suture should be adequately tight, and the remaining thread on the fish  
216 should be long enough to prevent the disattachment of the suture.

217

### 218 3. Blood sampling procedure

219 3.1. Prepare the tools including glass needle, silicone capillary, a plastic tube with a  
220 hole, an empty 1.5 ml plastic tube, a 1.5 ml plastic tube containing 1X PBS, mini  
221 centrifuge, and tape.

222

223 3.2. Anesthetize the fish using 0.02% MS-222 solution as described in **step 2.1**, and  
224 place the fish under a dissection microscope in a vertical position (**Figure 4A**).

225 **NOTE:** It is highly recommended to place the fish on a bright surface to ease visualization  
226 of the caudal puncture vein.

227

228 3.3. Install the blood drawer by attaching a glass needle to the silicone tubing (**Figure**  
229 **4B**). Break the tip of the needle with forceps with wide tip, and coat the anti-  
230 coagulant inside a needle by suctioning and blowing.

231 **NOTE:** Make sure that the opening of the needle tip is sufficiently large to allow drawing  
232 the blood.

233

234 3.4. Direct the needle toward the peduncle area of the fish, aim at the caudal peduncle  
235 vein (**Figure 5A**) and draw the blood using mouth until at least one fourth the total  
236 volume of the needle is filled (**Figure 5B**).



237 **NOTE:** It is important to stop suctioning when removing the needle from fish body.

238

239 3.5. Release the needle and put a piece of tape on it. Place the lid with a hole on a  
240 reservoir tube and put the needle inside the tube through the hole with the needle  
241 tip on the outside (**Figure 5C**).

242

243 3.6. Spin down the blood to collect the blood in the tube

244

245 3.7. Proceed directly to downstream applications, or store the blood at -20 °C until  
246 use.

247 **NOTE:** The blood analysis is dependent on what outcome is required. For sex steroid  
248 analysis such as E2 or 11KT, 1 ul of collected blood is adequate for the analysis. The  
249 blood can be diluted in 1X PBS and extract steroids with diethyl ether or  
250 dichloromethane if necessary. In many previous studies, clot was removed, however, as  
251 the volume of blood is so small that we can ignore the effects in most cases.

252

253

## 254 Representative Results

255 This protocol describes every step for performing gonadectomy and blood  
256 sampling in small sized teleosts, using the Japanese medaka as a model. The survival rate  
257 of the fish after ovariectomy (OVX) in females is 100% (10 out of 10 fish) while 94% (17  
258 out of 18 fish) of the males survived after orchidectomy. Meanwhile, after blood sampling  
259 procedure was performed, all (38 fish) fish survived.

260 Sham-operated females show oviposition (**Figure 6A**) and all the eggs are fertilized  
261 and allow for embryonic development (**Figure 6B**). Sham operated males are also able to  
262 fertilize eggs after only a couple of weeks. Similarly, partly-gonadectomized females  
263 reared with partly-gonadectomized males also show oviposition and showed 100% of  
264 fertilized eggs after 2 months. In contrast, no oviposition in females or fertilization by  
265 males could be observed in fully gonadectomized fish, even after 4 months.

266 When performed correctly, the body shape of the fish slightly changes (Figure 7A).  
267 If performed correctly, no piece of gonad should remain after the gonadectomy  
268 procedure when dissected (Figure 7B).

269 Four weeks post-gonadectomy, the incision and suture completely disappeared  
270 (**Figure 8**), and after 4 months, all gonadectomized fish still showed healthy phenotype,  
271 and no gonadal tissue could be found.

272 E2 and 11-KT blood concentrations measured with ELISA following the  
273 manufacturer's instructions revealed that E2 levels in OVX females ( $0,36 \pm 0,2$  ng/ml) are  
274 significantly lower than in sham-operated females ( $4,15 \pm 0,5$  ng/ml) 24 hours after  
275 surgery (**Figure 9A**). Likewise, 11-KT concentrations in orchidectomized males ( $0,4 \pm 0,2$   
276 ng/ml) are also significantly lower than in sham-operated males ( $10.38 \pm 1.32$  ng/ml) 24  
277 hours after surgery (**Figure 9B**). There is no statistical difference in blood levels of E2 and  
278 11KT in gonadectomized fish after 4 months compared to the levels of those after 24  
279 hours (**Figure 9A-B**).

280 In contrast to fully OVX females, partly OVX fish, where only 1/3 to 1/2 of the  
281 gonad was removed, showed no difference in E2 levels ( $3,37 \pm 0,6$  ng/ml) compared to  
282 sham-operated fish (**Figure 9A**). However, in males there is a difference observed  
283 between 11KT levels of sham-operated fish and partly orchidectomized fish ( $8.37 \pm 1.92$   
284 ng/ml) (**Figure 9B**). However, partly orchidectomized males, where only 1/3 to 1/2 of the  
285 gonad was removed, showed significantly higher levels of 11KT compared to in fully  
286 orchidectomized fish.

287

## 288 Discussion

289 As reported in previous literature, gonadectomy and blood sampling have long  
290 been used in other model species to investigate questions related to the role of sex  
291 steroids in regulation of the BPG axis. However, these techniques seem to be amenable  
292 only for bigger animals. Considering the small size of the most used teleost models, we  
293 hereby describe detailed protocols for gonadectomy and blood sampling that are feasible  
294 for these small teleost models.

295           The fact that the survival rate of gonadectomized fish reached almost 100%  
296 indicates that the gonadectomy procedure is feasible to be applied on small fish.  
297 Similarly, the procedure of blood sampling does not affect the survivability of the fish as  
298 shown by the 100% survival after undergoing this procedure. In addition, sham-operated  
299 females reared together with sham-operated males show oviposition and 100% fertilized  
300 eggs, indicating that the incision and suture procedure do not affect the reproduction of  
301 the fish. In other words, they were healthy enough to spawn. Meanwhile, as shown in  
302 **Figure 7**, the incision and suture mark on the fish completely disappeared 4 weeks post-  
303 gonadectomy and the fish are still alive and look healthy 4 months after surgery,  
304 indicating that the operation procedure is safe for the fish for long term purpose  
305 gonadectomy and does not affect the life span of the fish. In addition, after 4 months no  
306 gonads are observed. This is confirmed by the low levels of E2 and 11KT which are still  
307 similar to that of those found in gonadectomized fish after 24 hours.

308           Partly gonadectomized fish showed comparable concentrations of sex steroids to  
309 sham-operated fish, and as a consequence, resulted in oviposition in the females and  
310 fertilization of eggs. These results suggest that the procedure of gonadectomy should be  
311 performed with high precision, meaning that the ovary or testes should be completely  
312 removed. Furthermore, since this procedure does not rely on Fish Anesthesia Delivery  
313 System (FADS) as demonstrated in <sup>52</sup>, the gonadectomy should be carried out as quickly  
314 as possible to prevent mortality during surgery. Indeed, the use of FADS enables us to  
315 maintain the rhythm of operation since this tool allows continuous anesthetic condition  
316 to the fish despite being exposed to the air. Nonetheless, due to its lower feasibility in  
317 smaller teleosts, the use of FADS cannot be performed with these sized fish. Many factors  
318 can affect the success rate of the procedure, including anesthesia period, the wideness of  
319 incision, the accuracy and tidiness of the suture and fish handling during the procedure.  
320 Since the protocol relies so much on the quick and clean procedure, some training is  
321 highly recommended until reaching high success rate, indicated by high survival rate of  
322 the fish after gonadectomy as well as complete removal of the gonads (see the difference  
323 of morphological and anatomical appearance of the fish before and after successful  
324 gonadectomy in **Figure 7**). Another important point is that one should prepare healthy  
325 fish by maintaining the fish optimally prior to performing the protocol.

326 With respect to blood sampling procedure, the steroid extraction is generally  
327 performed using diethyl ether or dichloromethane. Meanwhile, the evaluation of sex  
328 steroid concentrations is commonly carried out by using Enzyme-linked Immunosorbent  
329 Assay (ELISA) kit, and there have been many ELISA kits commercially available for  
330 different types of sex steroids. Due to the low amount of blood collected during blood  
331 sampling, the assays performed to evaluate sex steroid concentrations in small teleosts is  
332 not aimed for serum, but whole blood. This might influence the results obtained from the  
333 assays. A previous study<sup>53</sup> suggested that the quantification of sex steroids using whole  
334 blood can slightly differ from that of serum. Therefore, the comparison between plasma  
335 and blood concentrations of sex steroids should be investigated for each assay in order to  
336 determine whether measured concentrations from the assay should be re-calculated to  
337 get comparable results as from serum.

338 As documented in previous studies with different animal models, the protocol  
339 described here will allow us to investigate questions related to reproductive physiology  
340 using small teleosts as model. In fact, these techniques have already contributed to  
341 answer questions concerning the regulation of the BPG axis and its feedback  
342 mechanisms, such as the involvement of *kiss1* (kisspeptin gene type 1) expressing  
343 neurons in positive feedback loops<sup>54</sup>, estrogen-mediated regulation of *kiss1* expressing  
344 neurons in nucleus ventralis tuberis (NVT), and *kiss2* (kisspeptin gene type 2) expressing  
345 neurons in preoptic area (POA)<sup>55,56</sup>, the expression profile of *fshb* (follicle-stimulating  
346 hormone beta sub-unit gene) in *esr2a* (estrogen receptor gene) knock out (KO) fish<sup>57</sup> as  
347 well as the profile of circadian rhythm of E2 in female fish<sup>53</sup>. Furthermore, since previous  
348 studies demonstrated that sex steroids also affect the proliferation of gonadotropic cells  
349 in the pituitary of teleosts<sup>58,59</sup>, it would be intriguing to investigate the effects of sex  
350 steroid clearance after gonadectomy on pituitary plasticity. Besides, due to the fact that  
351 the protocol can also be applied for blood glucose measurements as demonstrated in  
352 zebrafish<sup>60</sup> and medaka<sup>61</sup>, it may also be expanded to address research questions in  
353 other fields of physiology.

354 Finally, the protocols described here are intended and optimized for adult  
355 medaka, and the outcomes due to different size of fish and materials used during the  
356 procedures may vary. Also, as medaka left and right ovaries/ testes are fused, which

357 might provide an important advantage for gonadectomy, this protocol might need few  
358 small adaptations before to be used in other species where this is not the case such as in  
359 zebrafish. Thus, an optimization according to the choice of laboratory equipment and fish  
360 size should be taken into account before testing these protocols.

361

## 362 [Disclosures](#)

363 The authors have nothing to disclose.

## 364 [Acknowledgements](#)

365 The authors thank Ms Lourdes Carreon G Tan for her assistance in the fish husbandry.  
366 This work was funded by NMBU, Grants-in-Aid from Japan Society for the Promotion of  
367 Science (JSPS) (Grant number 18H04881 and 18K19323), and grant for Basic Science  
368 Research Projects from Sumitomo Foundation to S.K.

## 369 [References](#)

- 370 1 Weltzien, F.-A., Andersson, E., Andersen, Ø., Shalchian-Tabrizi, K. & Norberg, B. The  
371 brain–pituitary–gonad axis in male teleosts, with special emphasis on flatfish  
372 (Pleuronectiformes). *Comparative Biochemistry and Physiology Part A: Molecular &*  
373 *Integrative Physiology*. **137** (3), 447-477, doi:10.1016/j.cbpb.2003.11.007, (2004).
- 374 2 Yaron, Z. & Levavi-Sivan, B. J. E. o. f. p. f. g. t. e. Endocrine regulation of fish reproduction.  
375 **2** 1500-1508 (2011).
- 376 3 Goldman, B. D. The circadian timing system and reproduction in mammals. *Steroids*. **64**  
377 (9), 679-685, doi:10.1016/S0039-128X(99)00052-5, (1999).
- 378 4 Taranger, G. L. *et al.* Control of puberty in farmed fish. *General and Comparative*  
379 *Endocrinology*. **165** (3), 483-515, doi:10.1016/j.ygcen.2009.05.004, (2010).
- 380 5 Messinis, I. E. Ovarian feedback, mechanism of action and possible clinical implications.  
381 *Human Reproduction Update*. **12** (5), 557-571, doi:10.1093/humupd/dml020, (2006).
- 382 6 Diotel, N. *et al.* Steroid Transport, Local Synthesis, and Signaling within the Brain: Roles in  
383 Neurogenesis, Neuroprotection, and Sexual Behaviors. *Frontiers in Neuroscience*. **12** 84,  
384 doi:10.3389/fnins.2018.00084, (2018).
- 385 7 Diotel, N. *et al.* The brain of teleost fish, a source, and a target of sexual steroids. *Front*  
386 *Neurosci*. **5** 137, doi:10.3389/fnins.2011.00137, (2011).
- 387 8 Larson, T. A. Sex Steroids, Adult Neurogenesis, and Inflammation in CNS Homeostasis,  
388 Degeneration, and Repair. *Frontiers in endocrinology*. **9** 205-205,  
389 doi:10.3389/fendo.2018.00205, (2018).
- 390 9 Fontaine, R. *et al.* Gonadotrope plasticity at cellular, population and structural levels: A  
391 comparison between fishes and mammals. *General and Comparative Endocrinology*. **287**  
392 113344, doi:10.1016/j.ygcen.2019.113344, (2020).
- 393 10 Fontaine, R. *et al.* Direct and indirect effects of sex steroids on gonadotrope cells  
394 plasticity in the teleost fish pituitary. (submitted).

- 395 11 Kanda, S. Evolution of the regulatory mechanisms for the hypothalamic-pituitary-gonadal  
396 axis in vertebrates—hypothesis from a comparative view. *General and Comparative*  
397 *Endocrinology*. **284** 113075, doi:10.1016/j.ygcen.2018.11.014, (2019).
- 398 12 Schreck, C. B. Stress and fish reproduction: The roles of allostasis and hormesis. *General*  
399 *and Comparative Endocrinology*. **165** (3), 549-556,  
400 doi:<https://doi.org/10.1016/j.ygcen.2009.07.004>, (2010).
- 401 13 Wendelaar Bonga, S. E. J. P. r. The stress response in fish. **77** (3), 591-625 (1997).
- 402 14 Mommsen, T. P. Paradigms of growth in fish. *Comparative Biochemistry and Physiology*  
403 *Part B: Biochemistry and Molecular Biology*. **129** (2), 207-219, doi:10.1016/S1096-  
404 4959(01)00312-8, (2001).
- 405 15 Won, E. & Borski, R. Endocrine Regulation of Compensatory Growth in Fish. **4** (74),  
406 doi:10.3389/fendo.2013.00074, (2013).
- 407 16 MacKenzie, D. S., VanPutte, C. M. & Leiner, K. A. Nutrient regulation of endocrine  
408 function in fish. *Aquaculture*. **161** (1), 3-25, doi:10.1016/S0044-8486(97)00253-6, (1998).
- 409 17 Rønnestad, I., Thorsen, A. & Finn, R. N. Fish larval nutrition: a review of recent advances  
410 in the roles of amino acids. *Aquaculture*. **177** (1), 201-216, doi:10.1016/S0044-  
411 8486(99)00082-4, (1999).
- 412 18 Borg, B. Androgens in teleost fishes. *Comparative Biochemistry and Physiology Part C:*  
413 *Pharmacology, Toxicology and Endocrinology*. **109** (3), 219-245, doi:10.1016/0742-  
414 8413(94)00063-G, (1994).
- 415 19 Rege, J. *et al.* Circulating 11-oxygenated androgens across species. *The Journal of Steroid*  
416 *Biochemistry and Molecular Biology*. **190** 242-249, doi:10.1016/j.jsmb.2019.04.005,  
417 (2019).
- 418 20 Blázquez, M., Bosma, P. T., Fraser, E. J., Van Look, K. J. W. & Trudeau, V. L. Fish as models  
419 for the neuroendocrine regulation of reproduction and growth. *Comparative*  
420 *Biochemistry and Physiology Part C: Pharmacology, Toxicology and Endocrinology*. **119**  
421 (3), 345-364, doi:10.1016/S0742-8413(98)00023-1, (1998).
- 422 21 Zambrano, D. Innervation of the teleost pituitary. *General and Comparative*  
423 *Endocrinology*. **3** 22-31, doi:10.1016/0016-6480(72)90130-X, (1972).
- 424 22 Weltzien, F.-A., Hildahl, J., Hodne, K., Okubo, K. & Haug, T. M. Embryonic development of  
425 gonadotrope cells and gonadotropic hormones – Lessons from model fish. *Molecular and*  
426 *Cellular Endocrinology*. **385** (1), 18-27, doi:10.1016/j.mce.2013.10.016, (2014).
- 427 23 Nelson, J. S., Grande, T. C. & Wilson, M. V. H. in *Fishes of the World* 128-129 (John  
428 Wiley & Sons, 2016).
- 429 24 Volff, J. N. Genome evolution and biodiversity in teleost fish. *Heredity*. **94** (3), 280-294,  
430 doi:10.1038/sj.hdy.6800635, (2005).
- 431 25 Powers, D. Fish as model systems. **246** (4928), 352-358, doi:10.1126/science.2678474 %J  
432 Science, (1989).
- 433 26 Harris, M. P., Henke, K., Hawkins, M. B. & Witten, P. E. Fish is Fish: the use of  
434 experimental model species to reveal causes of skeletal diversity in evolution and disease.  
435 *Zeitschrift fur angewandte Ichthyologie = Journal of applied ichthyology*. **30** (4), 616-629,  
436 doi:10.1111/jai.12533, (2014).
- 437 27 Naruse, K., Tanaka, M. & Takeda, H. *Medaka: A Model for Organogenesis, Human*  
438 *Disease, and Evolution*. (Springer, 2011).
- 439 28 Briggs, J. P. The zebrafish: a new model organism for integrative physiology. **282** (1), R3-  
440 R9, doi:10.1152/ajpregu.00589.2001, (2002).
- 441 29 Green, P. G. *et al.* Sex Steroid Regulation of the Inflammatory Response:  
442 Sympathoadrenal Dependence in the Female Rat. **19** (10), 4082-4089,  
443 doi:10.1523/JNEUROSCI.19-10-04082.1999 %J The Journal of Neuroscience, (1999).

- 444 30 Pakarinen, P. & Huhtaniemi, I. Gonadal and sex steroid feedback regulation of  
445 gonadotrophin mRNA levels and secretion in neonatal male and female rats. **3** (2), 139,  
446 doi:10.1677/jme.0.0030139, (1989).
- 447 31 Purves-Tyson, T. D. *et al.* Testosterone regulation of sex steroid-related mRNAs and  
448 dopamine-related mRNAs in adolescent male rat substantia nigra. *BMC Neuroscience*. **13**  
449 (1), 95, doi:10.1186/1471-2202-13-95, (2012).
- 450 32 Adkins-Regan, E. & Ascenzi, M. Sexual differentiation of behavior in the zebra finch: Effect  
451 of early gonadectomy or androgen treatment. *Hormones and Behavior*. **24** (1), 114-127,  
452 doi:10.1016/0018-506X(90)90031-R, (1990).
- 453 33 McCreery, B. R. & Licht, P. Effects of gonadectomy and sex steroids on pituitary  
454 gonadotrophin release and response to gonadotrophin-releasing hormone (GnRH)  
455 agonist in the bullfrog, *Rana catesbeiana*. *General and Comparative Endocrinology*. **54** (2),  
456 283-296, doi:10.1016/0016-6480(84)90183-7, (1984).
- 457 34 Maran, R. R. M. *et al.* Transient Neonatal Hypothyroidism Alters Plasma and Testicular Sex  
458 Steroid Concentration in Puberal Rats. *Endocrine Research*. **26** (3), 411-429,  
459 doi:10.3109/07435800009066177, (2000).
- 460 35 Gangula, P. R. R., Wimalawansa, S. J. & Yallampalli, C. Pregnancy and sex steroid  
461 hormones enhance circulating calcitonin gene-related peptide concentrations in rats.  
462 *Human Reproduction*. **15** (4), 949-953, doi:10.1093/humrep/15.4.949, (2000).
- 463 36 Coddington, E. J. & Cree, A. Effect of Acute Captivity Stress on Plasma Concentrations of  
464 Corticosterone and Sex Steroids in Female Whistling Frogs, *Litoria ewingi*. *General and*  
465 *Comparative Endocrinology*. **100** (1), 33-38, doi:10.1006/gcen.1995.1129, (1995).
- 466 37 Adkins-Regan, E., Abdelnabi, M., Mobarak, M. & Ottinger, M. A. Sex steroid levels in  
467 developing and adult male and female zebra finches (*Poephila guttata*). *General and*  
468 *Comparative Endocrinology*. **78** (1), 93-109, doi:10.1016/0016-6480(90)90051-M, (1990).
- 469 38 de Gier, J. *et al.* Effects of gonadotropin-releasing hormone administration on the  
470 pituitary-gonadal axis in male and female dogs before and after gonadectomy.  
471 *Theriogenology*. **77** (5), 967-978, doi:10.1016/j.theriogenology.2011.10.003, (2012).
- 472 39 Smith, J. T., Clifton, D. K. & Steiner, R. A. Regulation of the neuroendocrine reproductive  
473 axis by kisspeptin-GPR54 signaling. **131** (4), 623, doi:10.1530/rep.1.00368, (2006).
- 474 40 Elsaesser, F. & Parvizi, N. Estrogen Feedback in the Pig: Sexual Differentiation and the  
475 Effect of Prenatal Testosterone Treatment. *Biology of Reproduction*. **20** (5), 1187-1193,  
476 doi:10.1095/biolreprod20.5.1187, (1979).
- 477 41 Alvarado, M. V. *et al.* Actions of sex steroids on kisspeptin expression and other  
478 reproduction-related genes in the brain of the teleost fish European sea bass. **219** (21),  
479 3353-3365, doi:10.1242/jeb.137364 %J The Journal of Experimental Biology, (2016).
- 480 42 Godwin, J., Crews, D. & Warner, R. R. Behavioural sex change in the absence of gonads in  
481 a coral reef fish. *Proceedings: Biological Sciences*. **263** (1377), 1683-1688,  
482 doi:10.1098/rspb.1996.0246, (1996).
- 483 43 Jenkins, N. & Dodd, J. M. Effects of ovariectomy of the dogfish *Scyliorhinus canicula* L. on  
484 circulating levels of androgen and oestradiol and on pituitary gonadotrophin content. **21**  
485 (3), 297-303, doi:10.1111/j.1095-8649.1982.tb02834.x, (1982).
- 486 44 Senthilkumaran, B. & Joy, K. P. Effects of ovariectomy and oestradiol replacement on  
487 hypothalamic serotonergic and monoamine oxidase activity in the catfish,  
488 *Heteropneustes fossilis*: a study correlating plasma oestradiol and gonadotrophin levels.  
489 *Journal of Endocrinology*. **142** (2), 193, doi:10.1677/joe.0.1420193, (1994).
- 490 45 Manickam, P. & Joy, K. P. Changes in hypothalamic catecholamine levels in relation to  
491 season, ovariectomy, and 17 $\beta$ -estradiol replacement in the catfish, *Clarias batrachus* (L.).  
492 *General and Comparative Endocrinology*. **80** (2), 167-174, doi:10.1016/0016-  
493 6480(90)90161-E, (1990).

- 494 46 Kasahara, M. *et al.* The medaka draft genome and insights into vertebrate genome  
495 evolution. *Nature*. **447** (7145), 714-719, doi:10.1038/nature05846, (2007).  
496 47 Hori, H. 1-16 (2011).  
497 48 Fontaine, R. & Weltzien, F.-A. Labeling of Blood Vessels in the Teleost Brain and Pituitary  
498 Using Cardiac Perfusion with a Dil-fixative. *JoVE*. (148), e59768, doi:doi:10.3791/59768,  
499 (2019).  
500 49 Fontaine, R., Hodne, K. & Weltzien, F.-A. Healthy Brain-pituitary Slices for  
501 Electrophysiological Investigations of Pituitary Cells in Teleost Fish. *JoVE*. (138), e57790,  
502 doi:doi:10.3791/57790, (2018).  
503 50 Zhao, Y. & Wayne, N. L. Recording Electrical Activity from Identified Neurons in the Intact  
504 Brain of Transgenic Fish. *JoVE*. (74), e50312, doi:doi:10.3791/50312, (2013).  
505 51 Ager-Wick, E. *et al.* Preparation of a High-quality Primary Cell Culture from Fish  
506 Pituitaries. *JoVE*. (138), e58159, doi:doi:10.3791/58159, (2018).  
507 52 Sladky, K. K. & Clarke, E. O. Fish Surgery: Presurgical Preparation and Common Surgical  
508 Procedures. *Veterinary Clinics of North America: Exotic Animal Practice*. **19** (1), 55-76,  
509 doi:10.1016/j.cvex.2015.08.008, (2016).  
510 53 Kayo, D., Oka, Y. & Kanda, S. Examination of methods for manipulating serum 17 $\beta$ -  
511 Estradiol (E2) levels by analysis of blood E2 concentration in medaka (*Oryzias latipes*).  
512 *General and Comparative Endocrinology*. **285** 113272, doi:10.1016/j.ygcen.2019.113272,  
513 (2020).  
514 54 Kanda, S. *et al.* Identification of Kiss-1 Product Kisspeptin and Steroid-Sensitive Sexually  
515 Dimorphic Kisspeptin Neurons in Medaka (*Oryzias latipes*). *Endocrinology*. **149** (5), 2467-  
516 2476, doi:10.1210/en.2007-1503, (2008).  
517 55 Kanda, S., Karigo, T. & Oka, Y. Steroid Sensitive kiss2 Neurones in the Goldfish:  
518 Evolutionary Insights into the Duplicate Kisspeptin Gene-Expressing Neurones. **24** (6),  
519 897-906, doi:10.1111/j.1365-2826.2012.02296.x, (2012).  
520 56 Mitani, Y., Kanda, S., Akazome, Y., Zempo, B. & Oka, Y. Hypothalamic Kiss1 but Not Kiss2  
521 Neurons Are Involved in Estrogen Feedback in Medaka (*Oryzias latipes*). *Endocrinology*.  
522 **151** (4), 1751-1759, doi:10.1210/en.2009-1174, (2010).  
523 57 Kayo, D., Zempo, B., Tomihara, S., Oka, Y. & Kanda, S. Gene knockout analysis reveals  
524 essentiality of estrogen receptor  $\beta$ 1 (Esr2a) for female reproduction in medaka. *Scientific*  
525 *Reports*. **9** (1), 8868, doi:10.1038/s41598-019-45373-y, (2019).  
526 58 Fontaine, R., Ager-Wick, E., Hodne, K. & Weltzien, F.-A. Plasticity in medaka gonadotropes  
527 via cell proliferation and phenotypic conversion. **245** (1), 21, doi:10.1530/joe-19-0405,  
528 (2020).  
529 59 Fontaine, R., Ager-Wick, E., Hodne, K. & Weltzien, F.-A. Plasticity of Lh cells caused by cell  
530 proliferation and recruitment of existing cells. **240** (2), 361, doi:10.1530/joe-18-0412,  
531 (2019).  
532 60 Zang, L., Shimada, Y., Nishimura, Y., Tanaka, T. & Nishimura, N. Repeated Blood Collection  
533 for Blood Tests in Adult Zebrafish. *JoVE*. (102), e53272, doi:doi:10.3791/53272, (2015).  
534 61 Hasebe, M., Kanda, S. & Oka, Y. Female-Specific Glucose Sensitivity of GnRH1 Neurons  
535 Leads to Sexually Dimorphic Inhibition of Reproduction in Medaka. *Endocrinology*. **157**  
536 (11), 4318-4329, doi:10.1210/en.2016-1352, (2016).

537



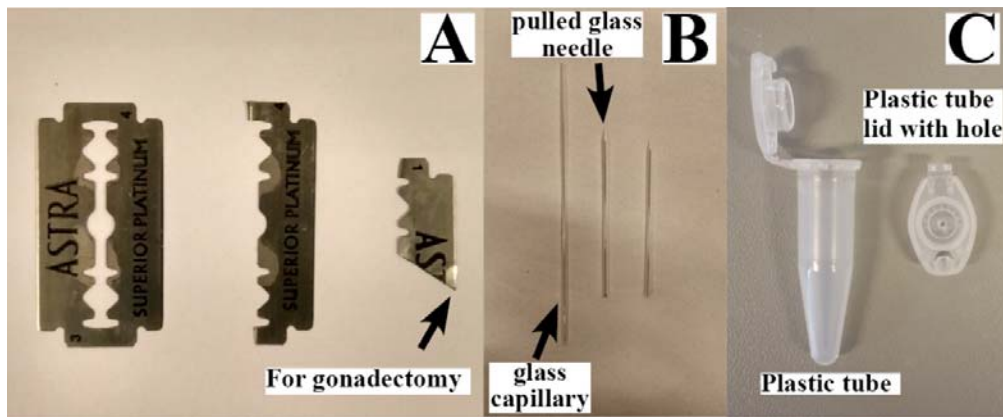

Fig 1. Razor blade for gonadectomy (A), glass needle for blood extraction (B), and plastic tube together with a lid with a hole for blood collection (C).

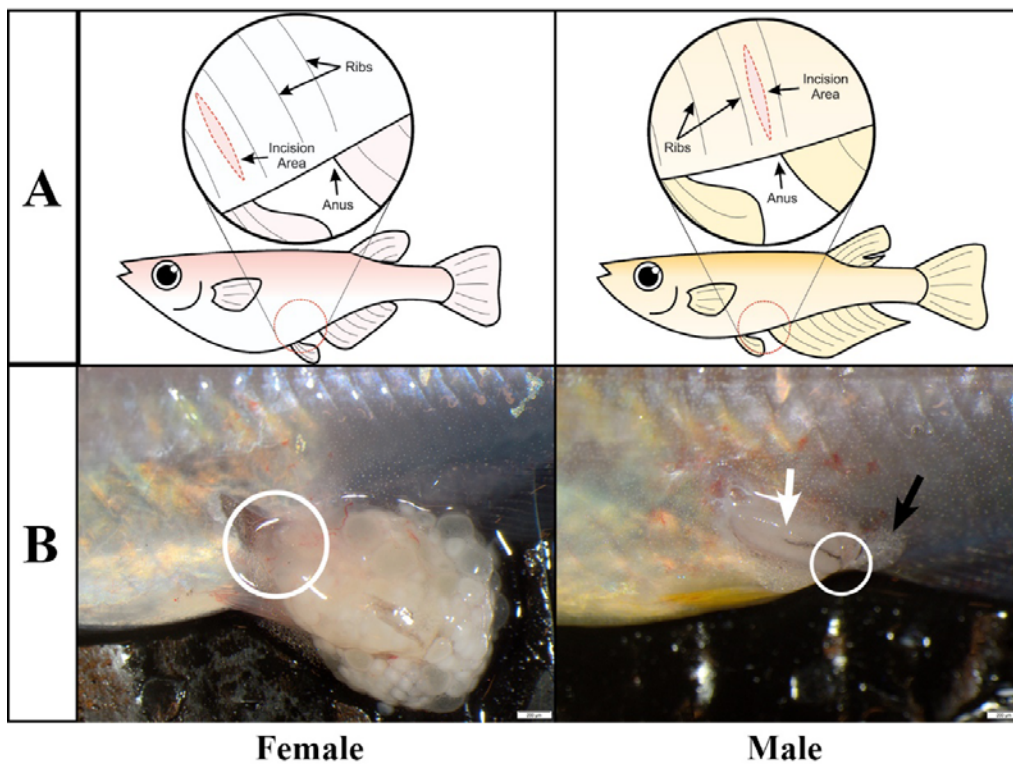

Fig 2. Location of the incision area. A) Drawing of the incision area located between the ribs in females (left panel) and males (right panel); B) gonad removal in females (left panel) and males (right panel), white circles showing the joint part, white arrow showing the testis and black arrow showing the fat.

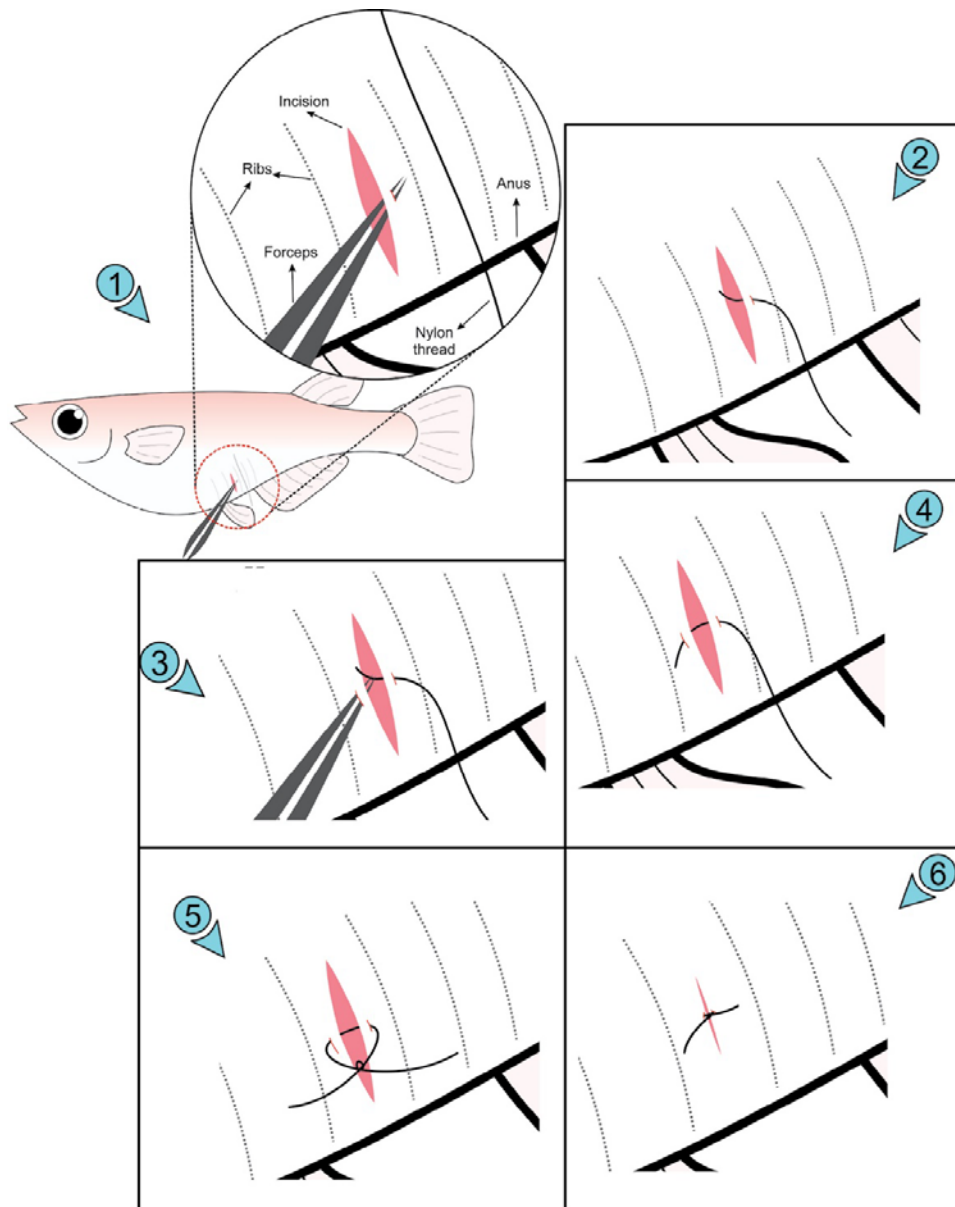

Figure 3. The procedure of suture. 1) a hole is made on the right side of the incision using fine forceps. 2) the nylon thread is passed through the skin using the hole made in 1. 3) a hole is made in the left side of the incision. 4) the nylon thread is passed through the hole made in 3. 5) an overhand knot is made twice to close the incision. 6) excess thread is cut.

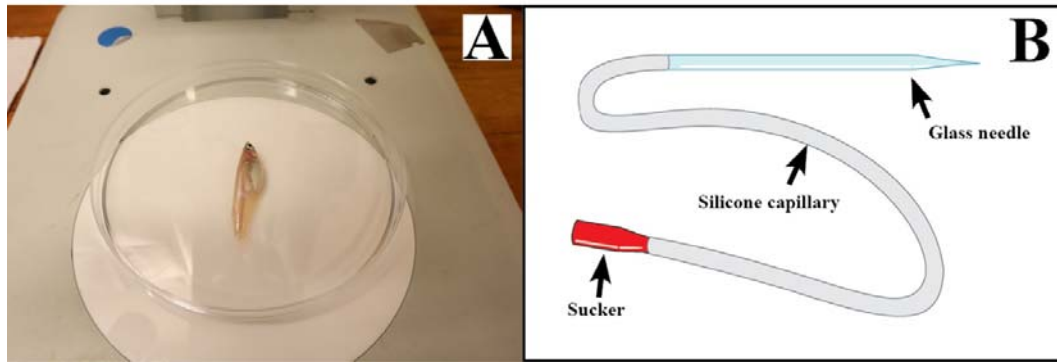

Fig 4. Fish position during blood sampling (A), the installation of glass needle with the silicone capillary (B).

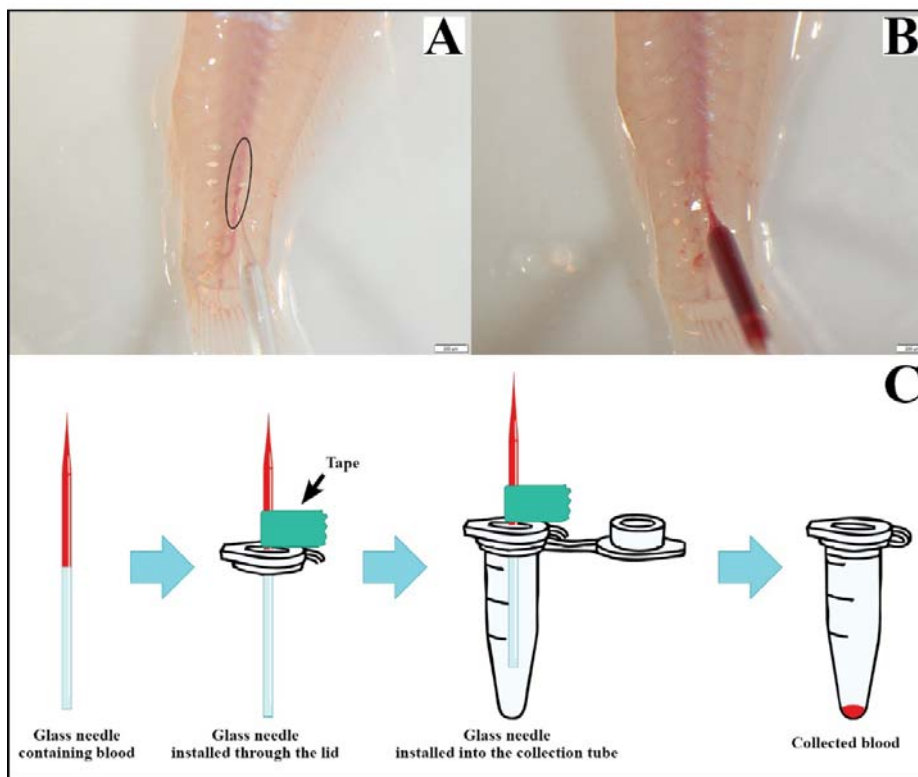

Fig 5. The suction area of blood sampling (A), drawn blood (B) and blood collection steps (C).

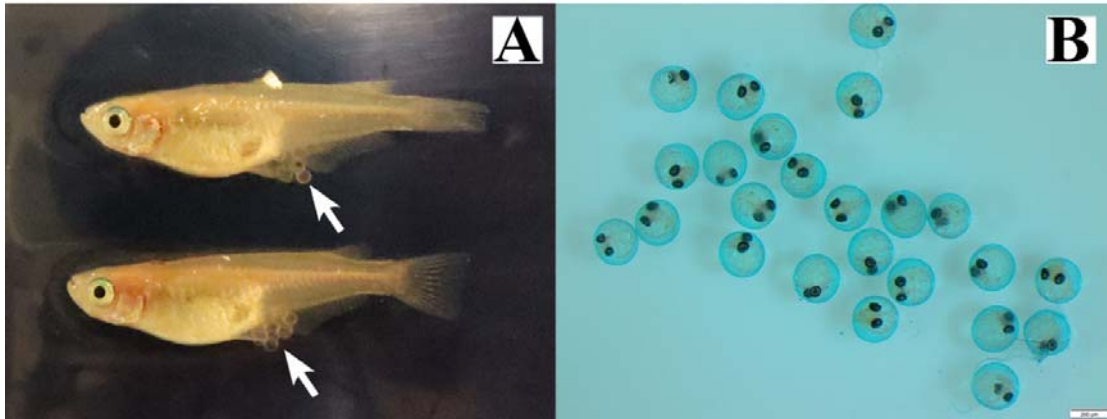

Fig 6. Sham-operated fish shows spawning. Oviposition of eggs (A) and fertilized eggs (B).

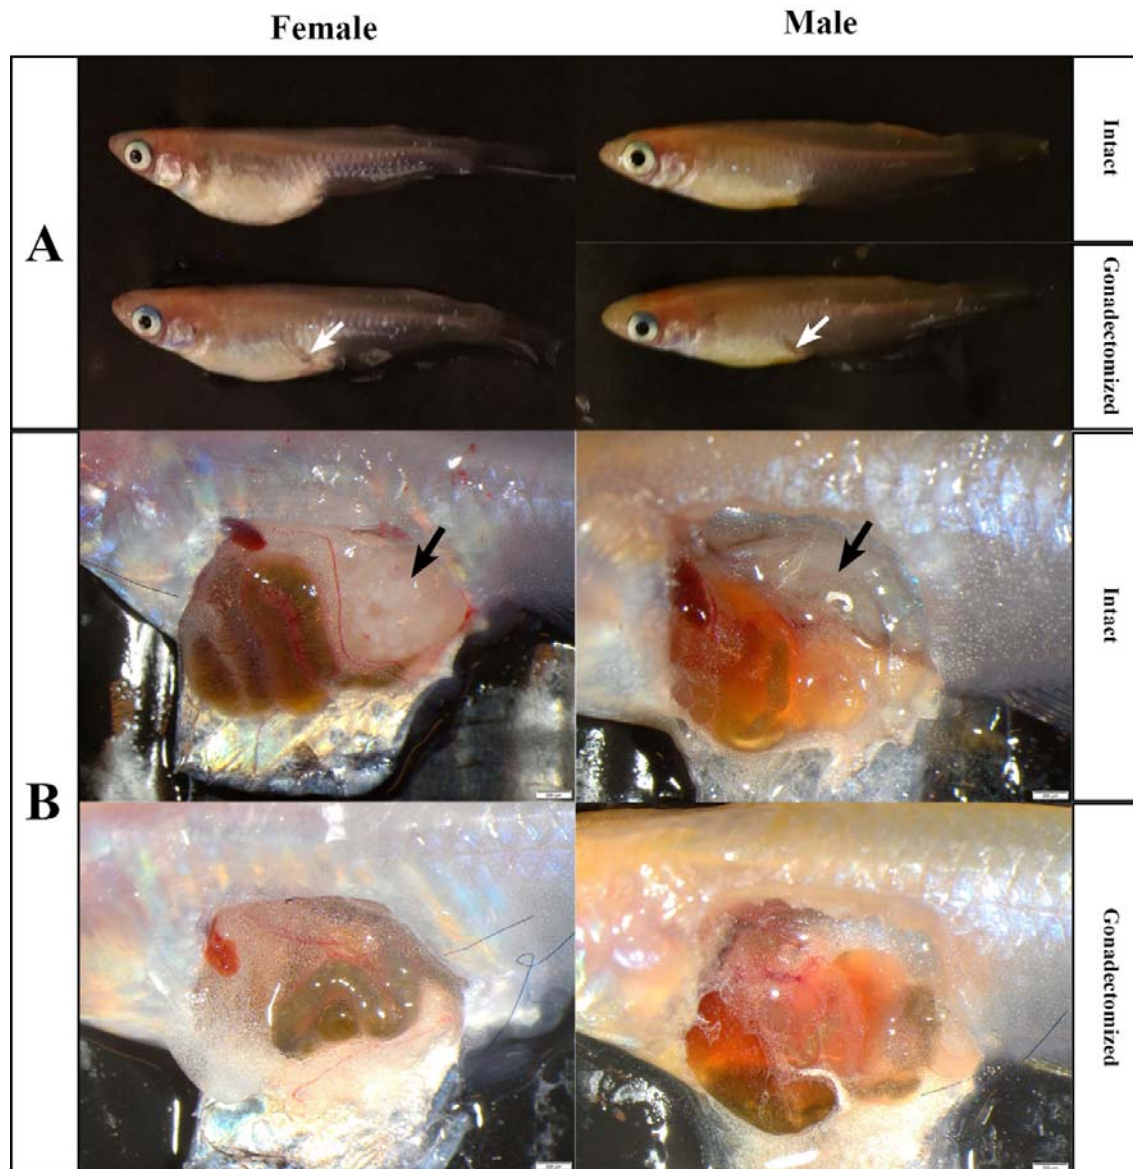

Fig 7. Morphological (A) and anatomical (B) appearance of intact and gonadectomized fish

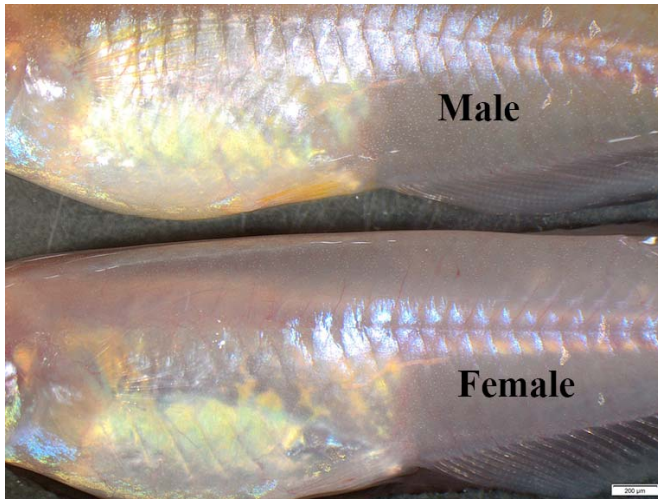

Fig 8. The incision and suture after 4 weeks.

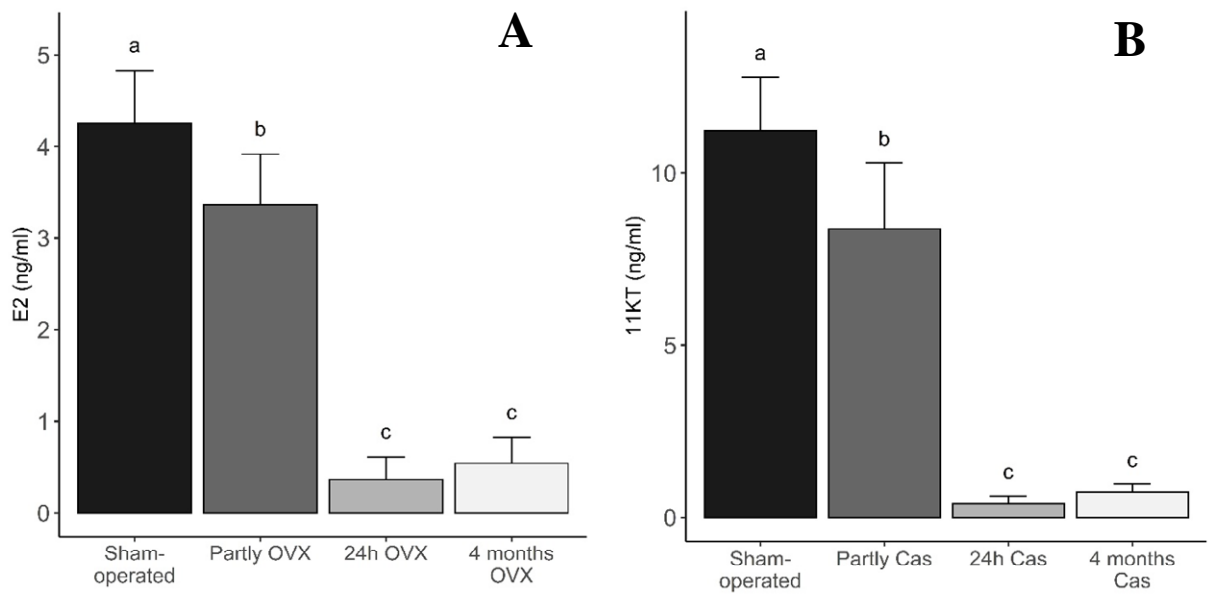

Fig 9. Blood levels of E2 in female (A) and 11KT in male (B) medaka, 24 hours after sham operation (control), partly gonadectomy or gonadectomy, and 4 months after gonadectomy (OVX, ovariectomy in females; Cas, castrated in males) (Data in the graph are provided as mean + SD; n = 5). Different letters (a-c) show statistically significant differences.
